# Supplementary material
Source: Springer Nature journal article supplement (https://www.springermedizin.de/resource/supplementary/12889_2012_4332_MOESM2_ESM.pdf/9492764)

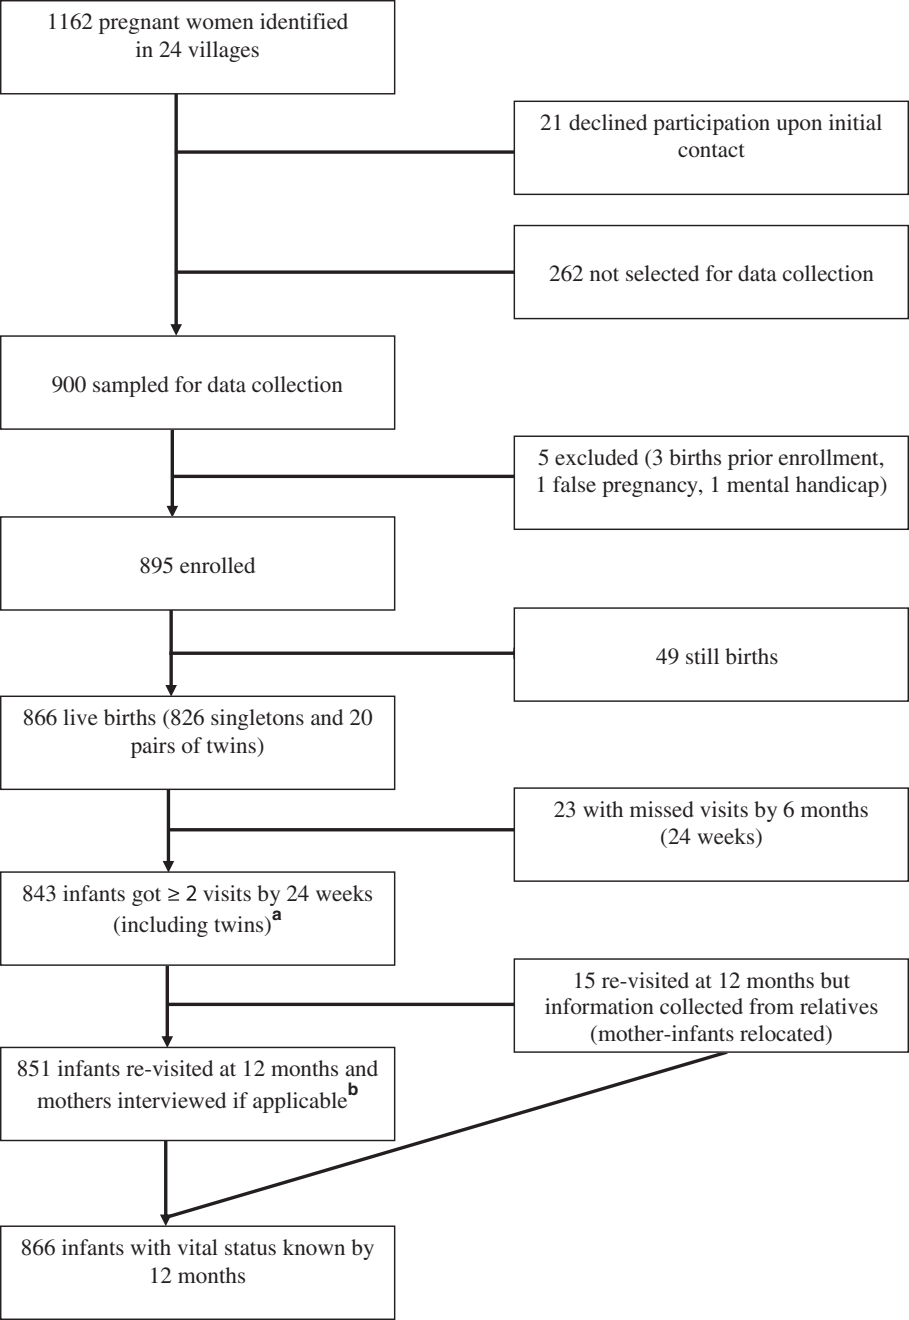

Supplement: MOESM2 [file 9492764]
